# Supplementary material for: Visualizing cellular heterogeneity by quantifying the dynamics of MAPK activity in live mammalian cells with synthetic fluorescent biosensors
Source: PubMed Central journal article supplement (PMC7723811; doi:10.1016/j.heliyon.2020.e05574), 2020-12-07
Supplement: mmc1.pdf [file mmc1.pdf]

## Supplementary Material to

### **Visualizing cellular heterogeneity by quantifying the dynamics of MAPK activity in live mammalian cells with synthetic fluorescent biosensors**

Min Ma, Pino Bordignon, Gian-Paolo Dotto and Serge Pelet

#### Supplemental information

Supplementary Figures 1-8

Supplementary Movie 1

Supplementary Tables 1-2

## Supplementary Figure Legends

### Supplementary Figure 1. ERK activity measured by Western blot and immunofluorescence

a. and b. Representative immunofluorescence microscopy images of HeLa cells exposed to EGF (50 ng/ml) stimulation for the indicated period of time and probed for phosphorylated ERK (a) or total ERK levels (b). c. Time course analysis of total and phosphorylated ERK by Western Blot upon stimulation of HeLa cells with 50 ng/ml EGF.

### Supplementary Figure 2. Characterization of the NLS and docking site specificity for ERK-SKARS function.

a. Amino acid sequence of NLS-2A and NLS-2E mutation. b. Cellular translocation of ERK-SKARS requires phosphorylatable NLS. After quantification of the time-lapse movies, Cyto/Nucl ratio of HeLa cells is plotted as function of time. HeLa cells expressing ERK-SKARS (green), ERK-SKARS<sup>4A</sup> (blue) and ERK-SKARS<sup>4E</sup> (red) were stimulated with EGF 50 ng/ml. The solid lines represent the median of the cell population and the shaded area the 25 and 75 percentiles of the population. More than 100 single cells were used to plot the graph. c. Amino acid sequence of the non-functional docking site of MEK2 for ERK. d. Microscopy images of HeLa cells co-expressing ERK-SKARS<sup>DS</sup> (green) and ERK-SKARS<sup>ND</sup> (red) exposed to EGF stimulation (50 ng/ml). HeLa cell nuclei were stained with Hoescht (cyan). e. Quantification of the time-lapse movie shown in d. The Cyto/Nucl ratio of the functional (green) and non-functional (red) sensors averaged over at least 120 single cells. f. Few single cell measurements of the normalized Cyto/Nucl ratio. Each color corresponds to one single cell. For this cell, the solid line represents the ERK-SKARS<sup>DS</sup> measured in the green channel and the dashed line represent the ERK-SKARS<sup>ND</sup> in the red channel.

### Supplementary Figure 3. ERK-SKARS specificity validated using MAPK inhibitors.

a. to c. HeLa cells expressing the ERK-SKARS were pre-incubated with DMSO (red), or ERK inhibitor (PD032591 100 nM, a, blue), p38 inhibitor (10 uM p38 inhibitor, b, green) and JNK inhibitor (10 uM JNK inhibitor VIII, c, yellow) for 30 min before imaging. Cells were subsequently stimulated with EGF 50 ng/ml.

#### **Supplementary Figure 4. Images of JNK-SKARS and p38-SKARS sensors.**

a. Specific sequence used for developing JNK. The JNK-SKARS is composed of the c-Jun docking site (c-Jun, amino acids 29-57), double NLS and the mCherry protein. b. Microscopy images of HeLa cells expressing the JNK-SKARS and stimulated with Anisomycin (50 ng/ml). c. The p38-SKARS is composed of the Mef2C docking site (Mef2C, amino acids 251-278), double NLS and the mCherry protein. c. Microscopy images of HeLa cells expressing the p38-SKARS and stimulated with Anisomycin (50 ng/ml).

#### **Supplementary Figure 5. Comparison of the SKARS and KTR reporters.**

a. Comparison of the relative fluorescence intensities of the ERK-SKARS-mCherry (red) and the ERK-KTR-mClover (green). Cells expressing both sensors within the range of fluorescence intensities indicated by the arrows were kept for analysis. b. Nuclear enrichment (Nucl/Cyto ratio) of the ERK-SKARS (red) and the ERK-KTR (green) before (solid line) and at the end of the time lapse (dashed line). c. Median of the Cyto/Nucl ratios from ERK-SKARS (red) and ERK-KTR (green) upon stimulation with 10 ng/ml EGF (dashed line, three biological replicates) and 0 ng/ml EGF (solid line). At least 160 single cell traces were measured for each replicate. The single cell traces were normalized to the basal level (the mean of the first 3 three time points). d. Violin plot of the normalized initial response of the ERK-SKARS (red) and ERK-KTR (green). Each dot represents one single cell measurement. The solid line is the median of the population. The asterisks denote a significant difference between the SKARS and KTR measurements based on a Wilcoxon rank sum test ( $P < 0.005$ )

#### **Supplementary Figure 6. Comparison of JNK-SKARS and JNK-KTR.**

a. Microscopy images of HeLa cells carrying JNK-SKARS-mCherry (red) and JNK-KTR-mClover (green) exposed to Anisomycin (50 ng/ml) stimulation and imaged at indicated time points. b. After quantification of the time-lapse movies, traces of Cyto/Nucl ratio from JNK-SKARS (red) and JNK-KTR (green) normalized by the average of the first 3 time points are plotted as function of time. c. Histograms of the cell nuclear fluorescence intensity in the GFP (JNK-KTR) and RFP (JNK-SKARS) channels. 134 cells expressing both sensors within the range of fluorescence intensities indicated by the arrows were kept for analysis. d. Few single cell measurements of the normalized Cyto/Nucl ratio following Anisomycin (50 ng/ml) stimulation. Each color corresponds to one single cell. For this cell, the solid line represents the ERK-SKARS measured in the red channel and the dashed line represent the ERK-KTR in the green channel.

### **Supplementary Figure 7. Single cell responses to high doses of EGF for two of the five clusters**

a. and b. Microscopy images of HeLa cells expressing the ERK-SKARS from two different sub-populations (C and E). The left panel displays the Cyto/Nucl measurements from four single cells from that sub-population (dashed lines). The thin solid line corresponds to the single cell identified in the microscopy images on the left with an asterisk. The thick solid line represents the mean response from the sub-population.

### **Supplementary Figure 8. Analysis of pulses in single cell responding to low doses of EGF.**

a. Median Cyto/Nucl ratio of a clonal population of HeLa cells expressing the ERK-SKARS responding to low concentrations of EGF ( $N_c > 300$ ) for more than 6 hours. b. Median (solid line) and 25- to 75-percentiles (area) of the Cyto/Nucl ratio of ERK-SKARS in more than 400 single cells from a clonal HeLa cell population stimulated with low doses of EGF and monitored for more than 3 hours. c. Violin plot of the initial response of the ERK-SKARS at various concentrations. Each dot represents one single cell measurement. The solid line is the median of the population. The asterisks denote a significant difference from the 0.0 ng/ml EGF control sample based on a Wilcoxon rank sum test ( $P < 0.005$ ). d. Histogram of the sum of the amplitudes of all the pulses in the traces displaying more than 2 pulses. The cell count in the histogram was normalized to the total number of cells measured in the dataset. e. Histogram of the number of peaks detected at the different concentrations of EGF.

### **Supplementary Movie 1. Pulses of ERK activity**

Time-lapse movie of HeLa cells expressing the ERK-SKARS displaying pulses in ERK activation upon 0.1 ng/ml EGF stimulation.

# Supplementary Figure 1

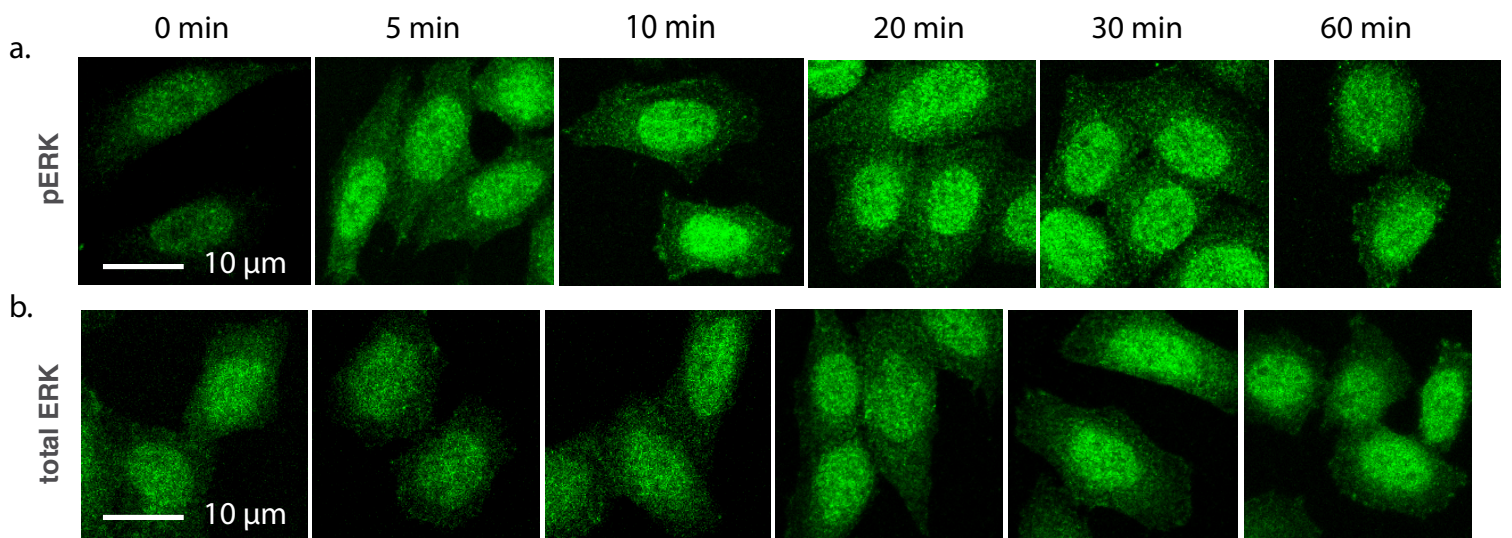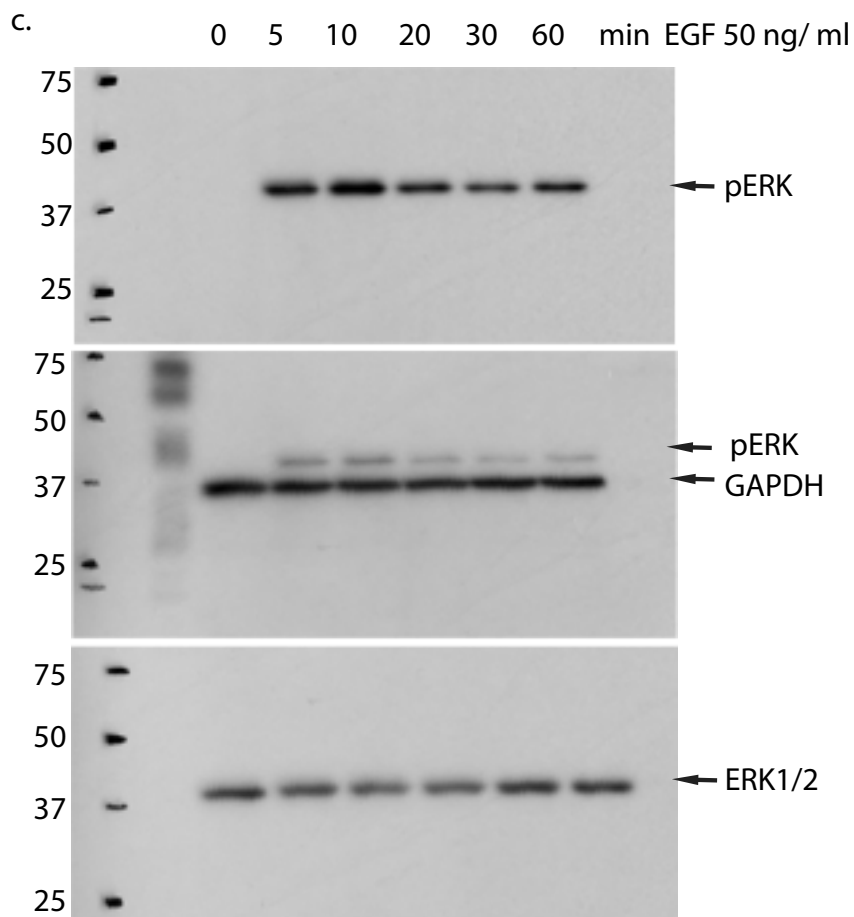

## Supplementary Figure 2

a.

NLS-2A: ELG**A**PL**K**KL**K**I**A**P**D**T

NLS-2E: ELG**E**PL**K**KL**K**I**E**P**D**T

b.

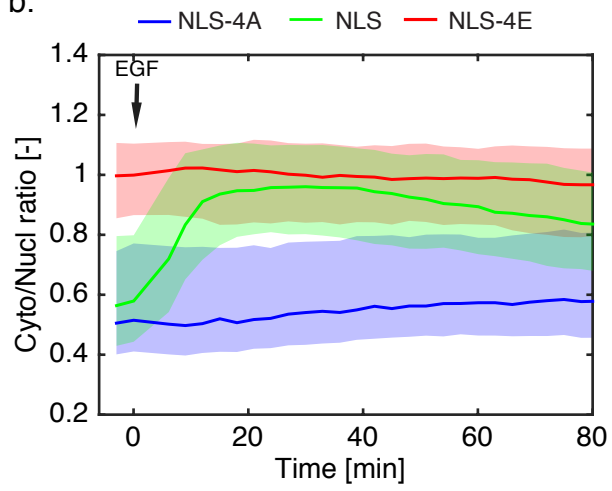

c.

MEK2<sub>ND</sub>:

MLA**A**AE**P**V**L**PA**A**T**A**N**P**T**I**A**E**GP**S**P**T**SE**G**ASE**A**N**L**V**D**L**Q**KK

d. -6 min 6 min 27 min 42 min 57 min 72 min 87 min

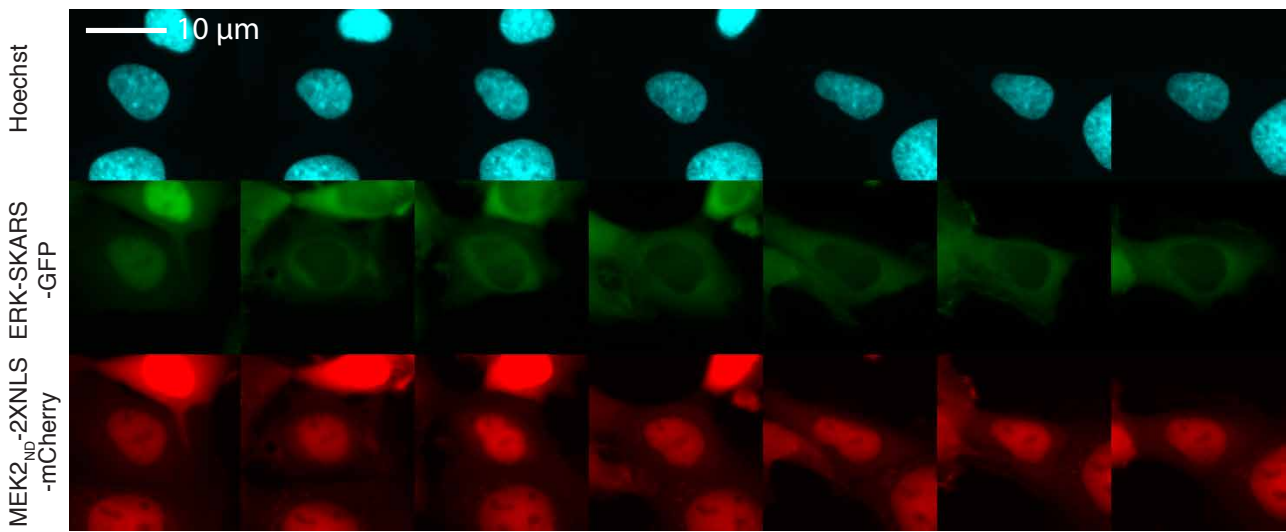

e.

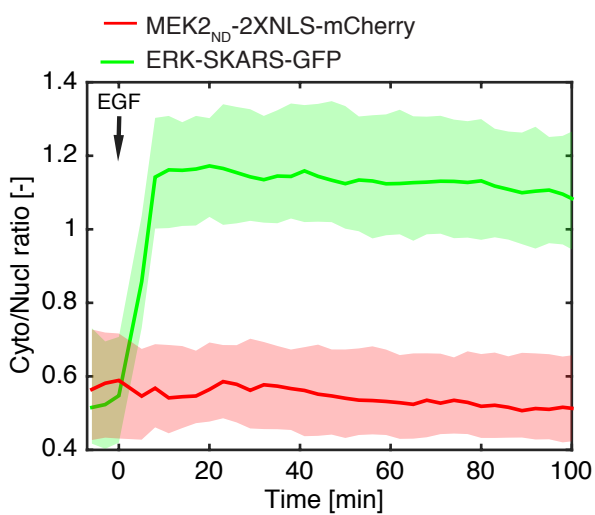

f.

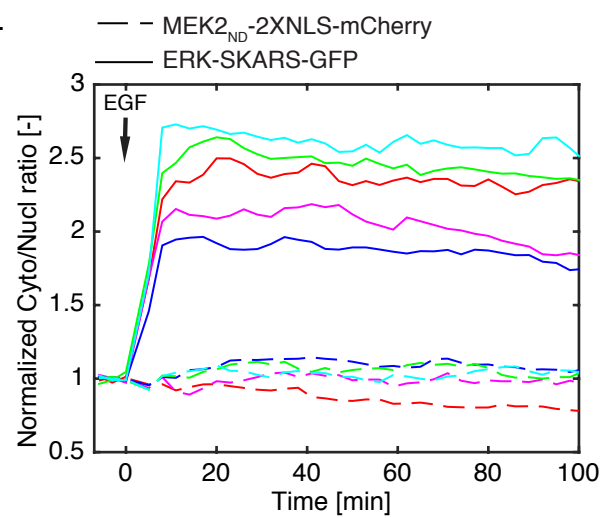

# Supplementary Figure 3

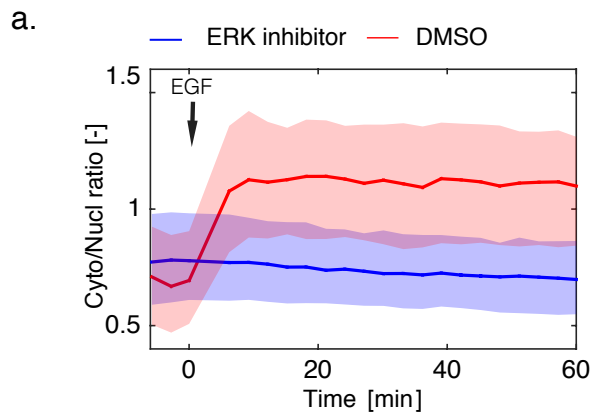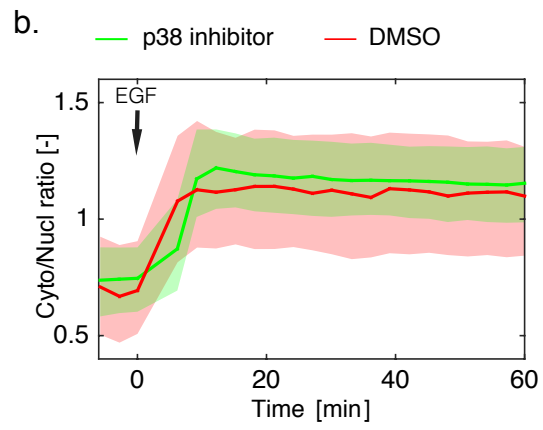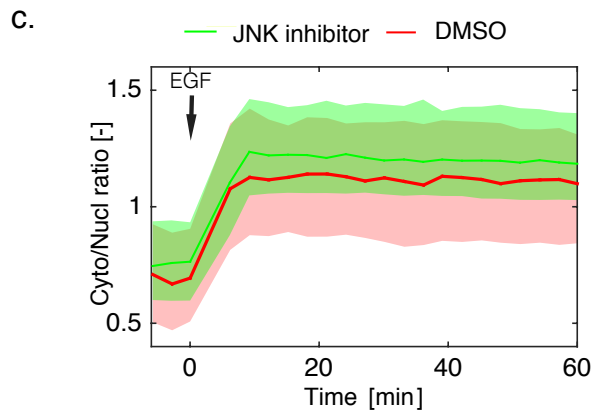

## Supplementary Figure 4

### a. JNK-SKARS

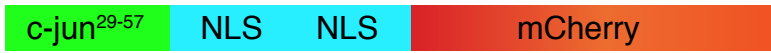

c-Jun DS:

MSNPKILKQSMTLNLADPVGSLKPHLRA

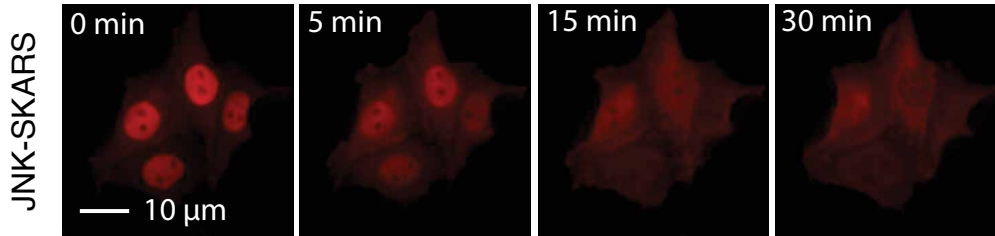

### b. p38-SKARS

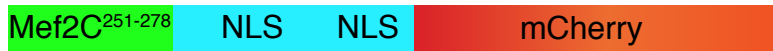

Mef2C DS:

MRKPDLRVLIIPPGSKNTMPVSNQRINNS

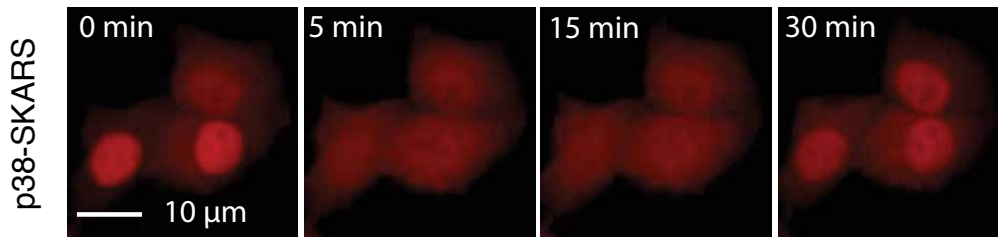



# Supplementary Figure 5

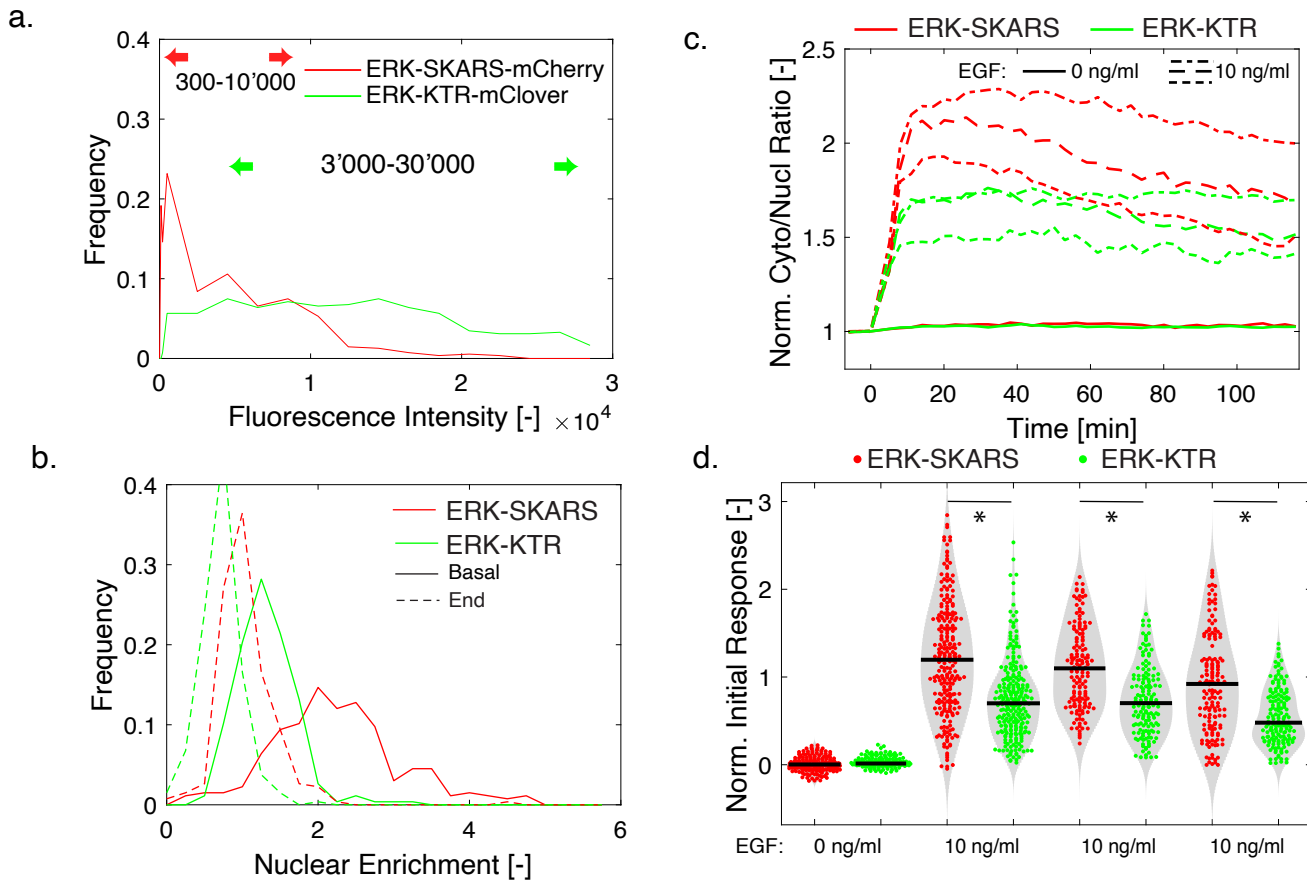

# Supplementary Figure 6

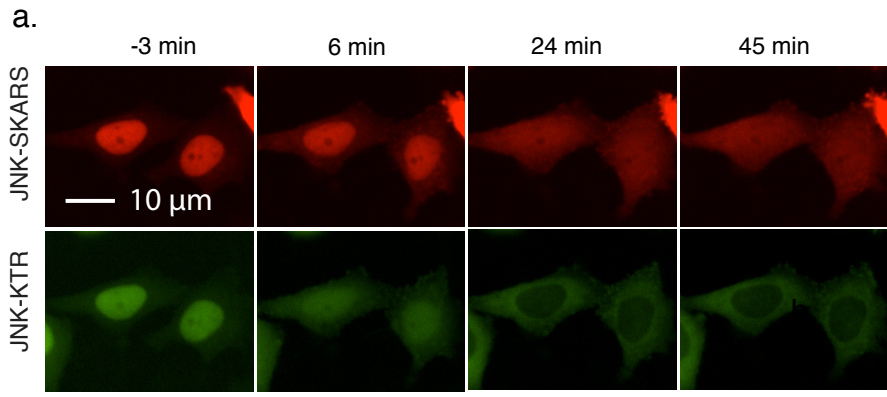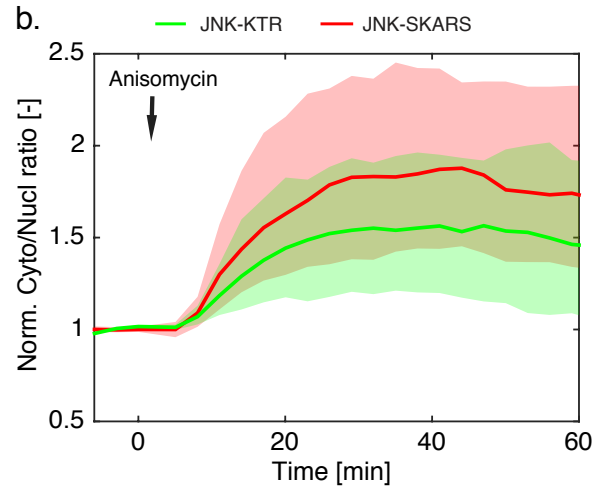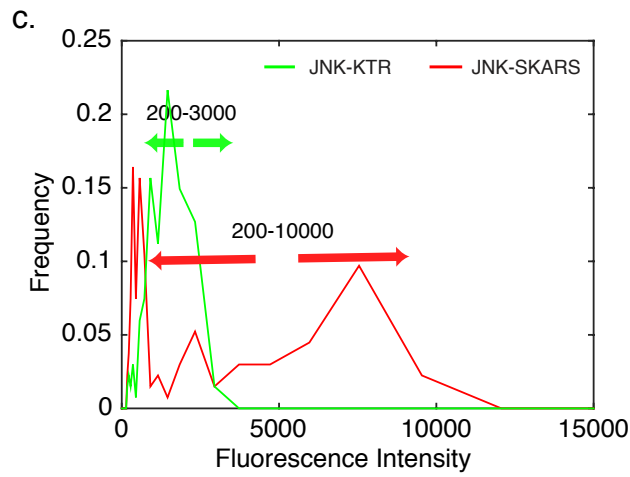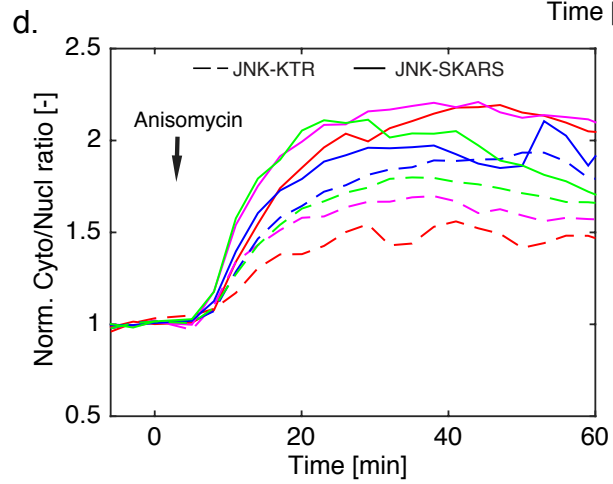

# Supplementary Figure 7

- a.   
 — mean of the subpopulation   
 - - other single cell traces   
 — single cell trace from image

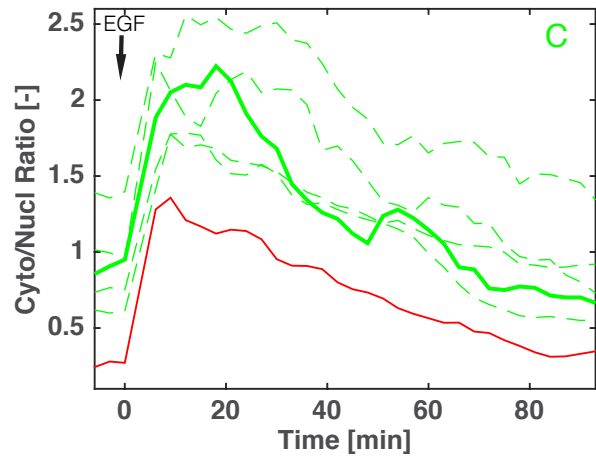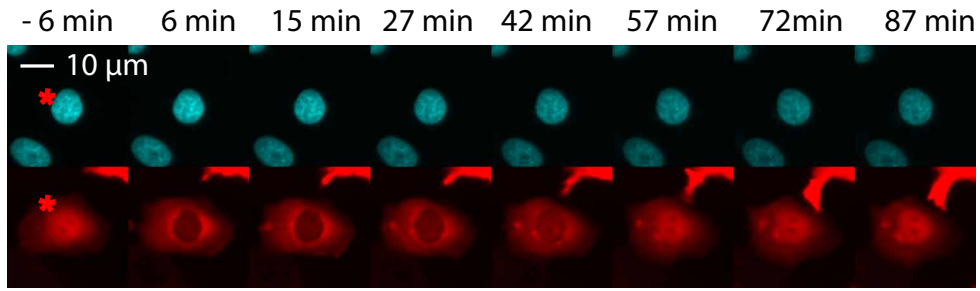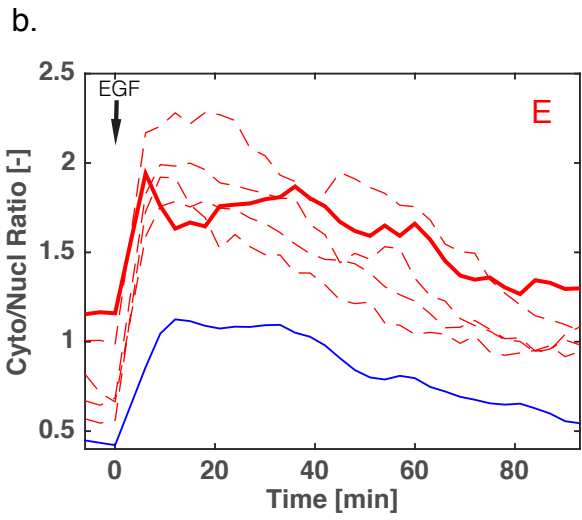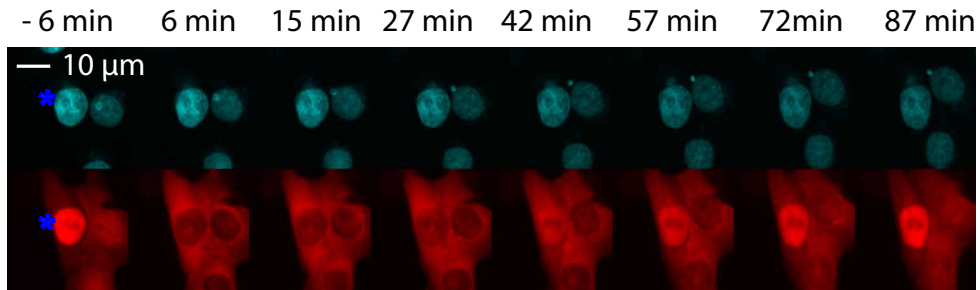

# Supplementary Figure 8

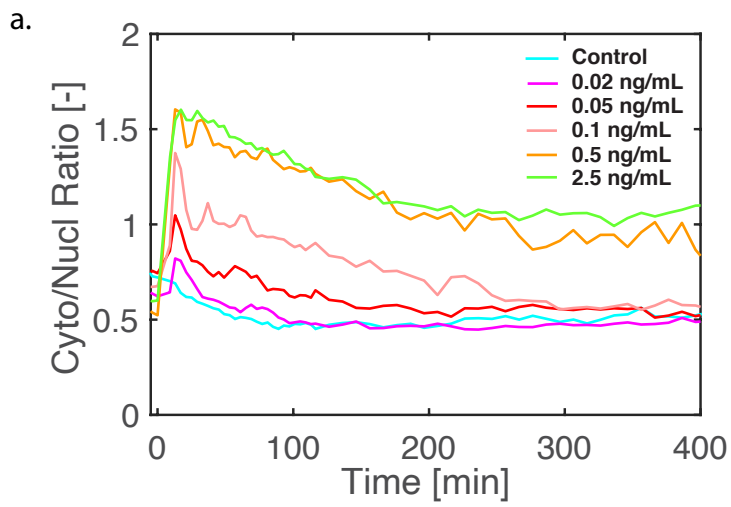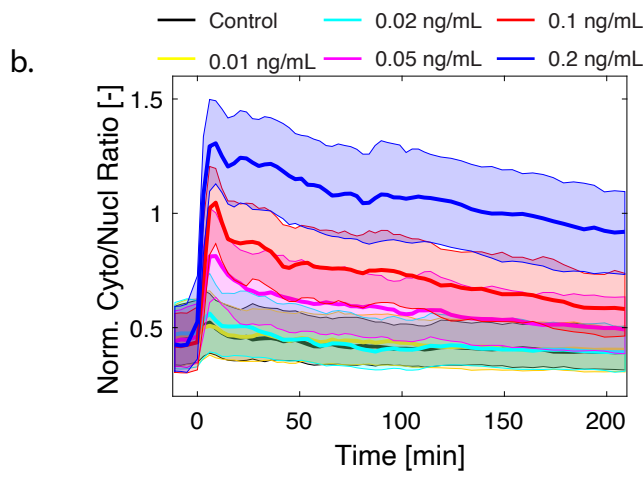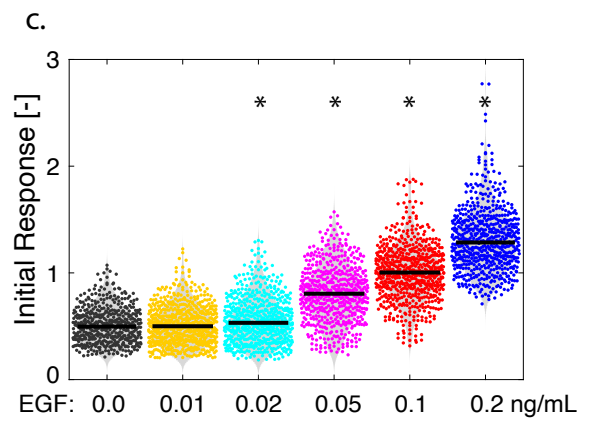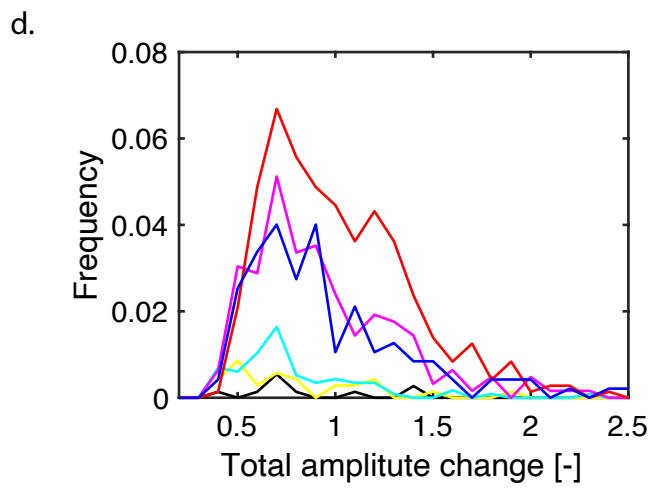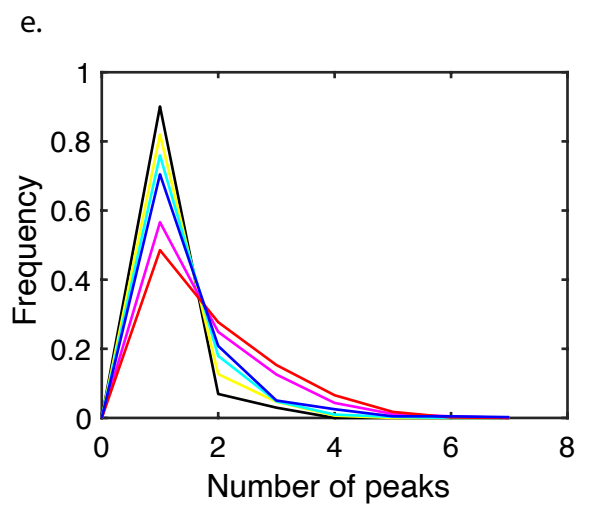

**Supplementary Table 1. Comparison between the SKARS and KTR responses.**

Experiments performed on three biological replicates treated either with 0 or 10 ng/ml of EGF. The median and the 25- and 75- percentiles is provided for each measurement.

|                                          | Replicate # 1<br>0ng/ml EGF |        | Replicate # 2<br>0ng/ml EGF |        | Replicate # 3<br>0ng/ml EGF |        | Replicate # 1<br>10ng/ml EGF |       | Replicate # 2<br>10ng/ml EGF |       | Replicate # 3<br>10ng/ml EGF |       |
|------------------------------------------|-----------------------------|--------|-----------------------------|--------|-----------------------------|--------|------------------------------|-------|------------------------------|-------|------------------------------|-------|
| <b>Initial Response SKARS</b>            | 0.014                       | -0.004 | 0.008                       | -0.024 | 0.003                       | -0.037 | 0.499                        | 0.344 | 0.511                        | 0.395 | 0.450                        | 0.264 |
|                                          |                             | 0.036  |                             | 0.050  |                             | 0.038  |                              | 0.651 |                              | 0.655 |                              | 0.622 |
| <b>Initiale Response KTR</b>             | 0.020                       | -0.008 | 0.026                       | -0.006 | 0.012                       | -0.003 | 0.496                        | 0.325 | 0.478                        | 0.310 | 0.374                        | 0.248 |
|                                          |                             | 0.046  |                             | 0.077  |                             | 0.051  |                              | 0.659 |                              | 0.632 |                              | 0.559 |
| <b>Normalized Initial Response SKARS</b> | 0.029                       | -0.005 | 0.017                       | -0.042 | 0.004                       | -0.056 | 1.203                        | 0.708 | 1.103                        | 0.672 | 0.923                        | 0.429 |
|                                          |                             | 0.083  |                             | 0.091  |                             | 0.082  |                              | 1.688 |                              | 1.548 |                              | 1.462 |
| <b>Normalized Initial Response KTR</b>   | 0.029                       | -0.009 | 0.030                       | -0.007 | 0.014                       | -0.005 | 0.701                        | 0.396 | 0.704                        | 0.385 | 0.482                        | 0.275 |
|                                          |                             | 0.065  |                             | 0.099  |                             | 0.069  |                              | 0.991 |                              | 1.014 |                              | 0.814 |
| <b>Basal Level SKARS</b>                 | 0.462                       | 0.357  | 0.549                       | 0.436  | 0.521                       | 0.427  | 0.431                        | 0.349 | 0.492                        | 0.364 | 0.521                        | 0.398 |
|                                          |                             | 0.678  |                             | 0.737  |                             | 0.706  |                              | 0.546 |                              | 0.621 |                              | 0.671 |
| <b>Basal Level KTR</b>                   | 0.735                       | 0.601  | 0.824                       | 0.711  | 0.824                       | 0.686  | 0.711                        | 0.596 | 0.705                        | 0.614 | 0.770                        | 0.638 |
|                                          |                             | 0.876  |                             | 0.962  |                             | 0.961  |                              | 0.867 |                              | 0.802 |                              | 0.884 |
| <b>Level 5min SKARS</b>                  | 0.476                       | 0.380  | 0.559                       | 0.446  | 0.526                       | 0.416  | 0.957                        | 0.787 | 1.028                        | 0.863 | 1.027                        | 0.852 |
|                                          |                             | 0.704  |                             | 0.717  |                             | 0.717  |                              | 1.137 |                              | 1.233 |                              | 1.186 |
| <b>Level 5min KTR</b>                    | 0.760                       | 0.643  | 0.874                       | 0.758  | 0.866                       | 0.712  | 1.214                        | 1.027 | 1.170                        | 1.058 | 1.147                        | 1.019 |
|                                          |                             | 0.890  |                             | 0.972  |                             | 0.972  |                              | 1.436 |                              | 1.349 |                              | 1.314 |
| <b>Level 100min SKARS</b>                | 0.509                       | 0.386  | 0.543                       | 0.438  | 0.515                       | 0.409  | 0.895                        | 0.728 | 0.831                        | 0.706 | 0.814                        | 0.643 |
|                                          |                             | 0.701  |                             | 0.676  |                             | 0.661  |                              | 1.043 |                              | 1.007 |                              | 0.969 |
| <b>Level 100min KTR</b>                  | 0.770                       | 0.636  | 0.833                       | 0.715  | 0.816                       | 0.672  | 1.185                        | 1.013 | 1.076                        | 0.946 | 1.091                        | 0.941 |
|                                          |                             | 0.903  |                             | 0.950  |                             | 0.915  |                              | 1.447 |                              | 1.273 |                              | 1.267 |
| <b>Number of cells</b>                   | 201                         |        | 134                         |        | 148                         |        | 234                          |       | 148                          |       | 157                          |       |

**Supplementary Table 2. Resources used in this study**

| REAGENT or RESOURCE                                                     | SOURCE                                        | IDENTIFIER     |
|-------------------------------------------------------------------------|-----------------------------------------------|----------------|
| <b>Chemicals, antibodies, recombinant peptides</b>                      |                                               |                |
| AEG 3482                                                                | Sigma-aldrich                                 | SML0264-5MG    |
| p38 MAP kinase inhibitor IV                                             | Sigma-aldrich                                 | SML0543-5MG    |
| FR180204                                                                | Sigma-aldrich                                 | SML0320-5MG    |
| Fibronectin                                                             | ThermoFisher Scientific                       | Gibco 33010018 |
| JetPEI                                                                  | Polyplus transfection                         | 101-10N        |
| Anisomycin                                                              | Sigma-aldrich                                 | A9789-5MG      |
| Recombinant human FGF-basic (154a.a)                                    | ThermoFisher Scientific                       | Gibco PHG0024  |
| EGF recombinant human protein                                           | ThermoFisher Scientific                       | PHG0311        |
| Paraformaldehyde                                                        | Sigma-aldrich                                 | 158172-500G    |
| Hoechst 33342                                                           | Molecular Probes                              | H3579          |
| Fibronectin                                                             | ThermoFisher Scientific                       | 33010-018      |
| Polybrene                                                               | Sigma-aldrich                                 | AL-118         |
| Phospho-p44/p42 MAPK (Erk1/2) (Thr202/tyr204) (D13.14.4E) XP Rabbit mAB | Cell Signaling Technology                     | 4370           |
| Rabbit anti-ERK1 Antibody (C-16)                                        | Santa Cruz                                    | sc-93          |
| Rabbit anti-ERK2 Antibody (C-14)                                        | Santa Cruz                                    | sc-154         |
| GAPDH FL-335                                                            | Santa Cruz                                    | sc-25778       |
| Donkey anti Rabbit IgG (H +L), Alexa Fluor 488                          | ThermoFisher Scientific                       | A-21206        |
| Rabbit IgG, HRP-linked whole Ab                                         | Amersham                                      | NA 934         |
| Dulbecco's modified Eagle's medium                                      | ThermoFisher Scientific                       | 31966021       |
| Gibco FluoroBrite DMEM medium                                           | ThermoFisher Scientific                       | A1896701       |
| fetal bovine serum                                                      | ThermoFisher Scientific                       | 10270106       |
| Antibiotics                                                             | ThermoFisher Scientific                       | 15240062       |
| Puromycin                                                               | ThermoFisher Scientific                       | A1113803       |
| <b>Experimental Models: Cell Lines</b>                                  |                                               |                |
| 293T                                                                    | ATCC                                          | CRL-11268      |
| HeLa                                                                    | ATCC                                          | CCL-2          |
| SCC13                                                                   | RRID                                          | CVCL-4029      |
| MDA-MB-231                                                              | ATCC                                          | HTB-26         |
| MCF7                                                                    | ATCC                                          | HTB-22         |
| Hela-ERK-SKARS                                                          | This paper                                    | N/A            |
| Hela-JNK-SKARS                                                          | This paper                                    | N/A            |
| Hela-p38-SKARS                                                          | This paper                                    | N/A            |
| SCC13-ERK-SKARS                                                         | This paper                                    | N/A            |
| MDA-MB-231-ERK-SKARS                                                    | This paper                                    | N/A            |
| MCF7-ERK-SKARS                                                          | This paper                                    | N/A            |
| Hela-ERK-KTR/SKARS                                                      | This paper                                    | N/A            |
| HeLa-JNK-KTR/SKARS                                                      | This paper                                    | N/A            |
| SCC13-ERK-SKARS ND/DS                                                   | This paper                                    | N/A            |
| Hela-ERK-SKARS SC1                                                      | This paper                                    | N/A            |
| <b>Experimental models: Primary cells</b>                               |                                               |                |
| HFF                                                                     | CHUV                                          | N/A            |
| <b>Experimental models: strain</b>                                      |                                               |                |
| mouse                                                                   |                                               |                |
| <b>Recombinant DNA (plasmid)</b>                                        |                                               |                |
| pLV-CMV-MEK2-2NLS-mCherry                                               | This paper                                    | pMM16          |
| pLV-CMV-cJun-2NLS-mCherry                                               | This paper                                    | pMM65          |
| pLV-CMV-cMef2C-2NLS-mCherry                                             | This paper                                    | pMM66          |
| pLV-CMV-MEK2ND-2NLS-mCherry                                             | This paper                                    | pMM26          |
| pLV-CMV-MEK2-2NLS(4A)-mCherry                                           | This paper                                    | pMM30          |
| pLV-CMV-MEK2-2NLS(4E)-mCherry                                           | This paper                                    | pMM31          |
| pLV-CMV-MEK2-2NLS-mClover                                               | This paper                                    | pMM55          |
| pLentiCMV Puro DEST ERKKTRClover                                        | Regot et al. 2014                             | Addgene 59150  |
| pLentiCMV Puro DEST JNKKTRClover                                        | Regot et al. 2014                             | Addgene 59151  |
| <b>Software and Algorithms</b>                                          |                                               |                |
| Micro-manager                                                           | Edelstein et al, 2010                         | ver 1.4        |
| FIJI Image J                                                            | <a href="http://fiji.sc/">http://fiji.sc/</a> | Ver 2.0        |
| YeastQuant platform                                                     | Pelet et al., 2012                            | Ver X.2        |
| Matlab software                                                         | Mathworks                                     | R2017b         |
